# Supplementary material for: Effect of regio-specific arylamine substitution on novel π-extended zinc salophen complexes: density functional and time-dependent density functional study on DSSC applications
Source: Royal Society of Chemistry journal article supplement (doi:10.1039/d2ra07571g), 2023-01-01
Supplement: d2ra07571g1.pdf [file d2ra07571g1.pdf]

## Supporting Information

Effect of Regio-specific Arylamine Substitution on Novel  $\pi$ -extended  
Zinc Salophen Complexes: Density Functional and Time-dependent  
Density Functional Study Prompted for DSSC Applications

*Jian-Ming Liao, Yu-Kai Chin, Yu-Ting Wu and Hsien-Hsin Chou\**

Department of Applied Chemistry, Providence University, Taichung 43301, Taiwan

### AUTHOR INFORMATION

#### **Corresponding Author**

\*E-mail: [hhchou@pu.edu.tw](mailto:hhchou@pu.edu.tw)

**Table S2.** Gas-phase TDDFT results for ZSC dyes calculated at B3LYP/6-311G(d,p) level of theory.

| YD-H |        |        |          |       |     | YD-AN |        |          |        |       |     |
|------|--------|--------|----------|-------|-----|-------|--------|----------|--------|-------|-----|
|      | eV     | nm     | <i>f</i> |       |     | eV    | nm     | <i>f</i> |        |       |     |
| S1   | 2.5876 | 479.15 | 0.5061   | H→L   | 96% | S1    | 2.2149 | 559.78   | 0.1358 | H→L   | 97% |
| S2   | 2.7766 | 446.54 | 0.0099   | H1→L  | 85% | S2    | 2.52   | 492      | 0.1154 | H1→L  | 9%  |
|      |        |        |          | H→L1  | 11% |       |        |          |        | H→L1  | 88% |
| S3   | 2.9948 | 414    | 0.147    | H1→L  | 9%  | S3    | 2.6642 | 465.37   | 0.448  | H1→L  | 87% |
|      |        |        |          | H1→L1 | 6%  |       |        |          |        | H→L1  | 9%  |
|      |        |        |          | H→L1  | 83% | S4    | 2.8686 | 432.21   | 0.0011 | H→L2  | 98% |
| S4   | 3.1316 | 395.92 | 0.1914   | H1→L  | 3%  | S5    | 2.981  | 415.91   | 0.0659 | H2→L  | 23% |
|      |        |        |          | H1→L1 | 88% |       |        |          |        | H1→L1 | 74% |
|      |        |        |          | H→L1  | 3%  | S6    | 3.0753 | 403.16   | 0.1654 | H2→L  | 72% |
| S5   | 3.296  | 376.16 | 0.8236   | H2→L  | 13% |       |        |          |        | H1→L1 | 24% |
|      |        |        |          | H→L2  | 85% | S7    | 3.3049 | 375.15   | 0.8845 | H3→L  | 10% |
| S6   | 3.4153 | 363.03 | 0.0204   | H3→L  | 77% |       |        |          |        | H2→L1 | 6%  |
|      |        |        |          | H2→L  | 8%  |       |        |          |        | H1→L2 | 81% |
|      |        |        |          | H1→L2 | 5%  | S8    | 3.3627 | 368.7    | 0.3043 | H6→L  | 3%  |
|      |        |        |          | H→L2  | 3%  |       |        |          |        | H2→L1 | 87% |
| S7   | 3.4301 | 361.46 | 0.1697   | H3→L  | 14% |       |        |          |        | H1→L2 | 5%  |
|      |        |        |          | H3→L1 | 2%  | S9    | 3.4128 | 363.29   | 0.0085 | H4→L  | 90% |
|      |        |        |          | H2→L  | 50% |       |        |          |        | H4→L1 | 2%  |
|      |        |        |          | H1→L2 | 23% | S10   | 3.4632 | 358.01   | 0.0518 | H3→L  | 82% |
|      |        |        |          | H→L2  | 7%  |       |        |          |        | H1→L2 | 10% |
| S8   | 3.4903 | 355.22 | 0.1185   | H2→L  | 23% | S11   | 3.6764 | 337.24   | 0.0802 | H4→L1 | 15% |
|      |        |        |          | H1→L2 | 70% |       |        |          |        | H3→L1 | 7%  |
|      |        |        |          | H→L2  | 2%  |       |        |          |        | H2→L2 | 72% |
| S9   | 3.6653 | 338.26 | 0.0422   | H8→L  | 3%  | S12   | 3.6849 | 336.46   | 0.0415 | H10→L | 4%  |
|      |        |        |          | H4→L  | 6%  |       |        |          |        | H6→L  | 3%  |
|      |        |        |          | H3→L1 | 27% |       |        |          |        | H4→L1 | 39% |
|      |        |        |          | H2→L1 | 57% |       |        |          |        | H3→L  | 2%  |
| S10  | 3.7145 | 333.78 | 0.0596   | H8→L  | 3%  |       |        |          |        | H3→L1 | 22% |

|     |        |        |        |       |     |     |        |        |        |       |     |
|-----|--------|--------|--------|-------|-----|-----|--------|--------|--------|-------|-----|
|     |        |        |        | H7→L  | 5%  |     |        |        |        | H2→L2 | 24% |
|     |        |        |        | H4→L  | 3%  | S13 | 3.7244 | 332.9  | 0.1062 | H9→L  | 3%  |
|     |        |        |        | H3→L1 | 54% |     |        |        |        | H6→L  | 3%  |
|     |        |        |        | H2→L1 | 29% |     |        |        |        | H4→L1 | 27% |
| S11 | 4.0275 | 307.84 | 0.3545 | H4→L  | 49% |     |        |        |        | H3→L1 | 59% |
|     |        |        |        | H2→L1 | 4%  | S14 | 4.023  | 308.19 | 0.4139 | H6→L  | 54% |
|     |        |        |        | H2→L2 | 41% |     |        |        |        | H5→L  | 14% |
| S12 | 4.0697 | 304.65 | 0.2607 | H4→L  | 33% |     |        |        |        | H3→L1 | 4%  |
|     |        |        |        | H2→L1 | 6%  |     |        |        |        | H3→L2 | 16% |
|     |        |        |        | H2→L2 | 54% |     |        |        |        | H2→L1 | 3%  |
| S13 | 4.1476 | 298.93 | 0.102  | H8→L  | 3%  |     |        |        |        | H→L4  | 2%  |
|     |        |        |        | H5→L  | 88% | S15 | 4.0682 | 304.77 | 0.1552 | H6→L  | 6%  |
| S14 | 4.2511 | 291.65 | 0.0215 | H8→L  | 27% |     |        |        |        | H5→L  | 4%  |
|     |        |        |        | H7→L  | 47% |     |        |        |        | H3→L1 | 2%  |
|     |        |        |        | H5→L  | 5%  |     |        |        |        | H3→L2 | 76% |
|     |        |        |        | H3→L  | 3%  |     |        |        |        | H→L4  | 4%  |
|     |        |        |        | H3→L1 | 10% | S16 | 4.0904 | 303.11 | 0.0137 | H6→L  | 21% |
|     |        |        |        | H3→L2 | 2%  |     |        |        |        | H5→L  | 63% |
| S15 | 4.H153 | 289.39 | 0.0605 | H5→L1 | 3%  |     |        |        |        | H5→L1 | 10% |
|     |        |        |        | H4→L1 | 89% |     |        |        |        | H→L7  | 2%  |
| S16 | 4.3619 | H15.25 | 0      | H6→L  | 7%  | S17 | 4.1252 | 300.55 | 0.0631 | H7→L  | 4%  |
|     |        |        |        | H6→L2 | 19% |     |        |        |        | H6→L  | 2%  |
|     |        |        |        | H1→L3 | 10% |     |        |        |        | H5→L  | 5%  |
|     |        |        |        | H→L3  | 59% |     |        |        |        | H→L4  | 76% |
| S17 | 4.4342 | 279.61 | 0.0001 | H7→L  | 4%  |     |        |        |        | H→L7  | 6%  |
|     |        |        |        | H3→L2 | 89% | S18 | 4.1589 | 298.12 | 0.1338 | H10→L | 6%  |
| S18 | 4.4647 | 277.7  | 0.0253 | H10→L | 8%  |     |        |        |        | H7→L  | 79% |
|     |        |        |        | H4→L1 | 3%  |     |        |        |        | H4→L1 | 2%  |
|     |        |        |        | H→L4  | 75% |     |        |        |        | H→L4  | 3%  |
| S19 | 4.5138 | 274.68 | 0.0452 | H9→L  | 11% | S19 | 4.2109 | 294.44 | 0.0329 | H→L4  | 8%  |

| S20    | 4.5177 | 274.44 | 0.0108 | H9→L2 | 4%  | S20    | 4.2435 | 292.18 | 0.0325 | H→L6  | 5%  |
|--------|--------|--------|--------|-------|-----|--------|--------|--------|--------|-------|-----|
|        |        |        |        | H8→L  | 46% |        |        |        |        | H→L7  | 73% |
|        |        |        |        | H7→L  | 28% |        |        |        |        | H10→L | 40% |
|        |        |        |        | H→L6  | 2%  |        |        |        |        | H9→L  | 29% |
|        |        |        |        | 139→L | 2%  |        |        |        |        | H7→L  | 9%  |
|        |        |        |        | H9→L  | 53% |        |        |        |        | H4→L  | 4%  |
|        |        |        |        | H9→L1 | 4%  |        |        |        |        | H4→L1 | 9%  |
|        |        |        |        | H9→L2 | 23% |        |        |        |        | H4→L2 | 3%  |
|        |        |        |        | H8→L  | 10% |        |        |        |        |       |     |
|        |        |        |        | H7→L  | 5%  |        |        |        |        |       |     |
| YD-DPA |        |        |        |       |     | YD-TPA |        |        |        |       |     |
|        | eV     | nm     | $f$    |       |     |        | eV     | nm     | $f$    |       |     |
| S1     | 2.1573 | 574.71 | 0.1709 | H→L   | 96% | S1     | 2.265  | 547.4  | 0.1465 | H→L   | 95% |
| S2     | 2.4927 | 497.39 | 0.0399 | H→L1  | 2%  | S2     | 2.5506 | 486.09 | 0.1368 | H1→L  | 14% |
|        |        |        |        | H1→L  | 5%  |        |        |        |        | H→L1  | 81% |
|        |        |        |        | H→L   | 2%  | S3     | 2.6304 | 471.36 | 0.4109 | H1→L  | 81% |
| S3     | 2.5975 | 477.32 | 0.4546 | H→L1  | 90% |        |        |        |        | H→L1  | 15% |
|        |        |        |        | H1→L  | 92% | S4     | 2.8655 | 432.68 | 0.0402 | H2→L  | 79% |
|        |        |        |        | H→L1  | 5%  |        |        |        |        | H1→L1 | 14% |
| S4     | 2.8981 | 427.81 | 0.0082 | H1→L1 | 5%  | S5     | 2.9472 | 420.69 | 0.0024 | H1→L1 | 4%  |
| S5     | 2.9249 | 423.89 | 0.1662 | H→L2  | 94% |        |        |        |        | H→L2  | 95% |
|        |        |        |        | H2→L  | 7%  | S6     | 2.9849 | 415.38 | 0.1367 | H2→L  | 15% |
|        |        |        |        | H1→L1 | 85% |        |        |        |        | H1→L1 | 77% |
| S6     | 3.1074 | 399    | 0.3399 | H→L2  | 5%  |        |        |        |        | H→L2  | 3%  |
|        |        |        |        | H2→L  | 87% | S7     | 3.1801 | 389.88 | 0.1411 | H2→L1 | 92% |
|        |        |        |        | H1→L1 | 7%  | S8     | 3.3053 | 375.11 | 1.2482 | H3→L  | 26% |
| S7     | 3.3027 | 375.41 | 0.7067 | H3→L  | 4%  |        |        |        |        | H1→L2 | 69% |
|        |        |        |        | H2→L1 | 5%  | S9     | 3.4131 | 363.26 | 0.0195 | H5→L  | 63% |
|        |        |        |        | H1→L2 | 88% |        |        |        |        | H3→L  | 16% |
| S8     | 3.3846 | 366.32 | 0.1968 | H5→L  | 4%  |        |        |        |        | H1→L2 | 11% |

|     |        |        |        |        |     |     |        |        |        |       |     |
|-----|--------|--------|--------|--------|-----|-----|--------|--------|--------|-------|-----|
|     |        |        |        | H3→L   | 5%  | S10 | 3.4315 | 361.31 | 0.0318 | H5→L  | 27% |
|     |        |        |        | H2→L1  | 83% |     |        |        |        | H5→L1 | 3%  |
|     |        |        |        | H1→L2  | 3%  |     |        |        |        | H3→L  | 49% |
| S9  | 3.4249 | 362.01 | 0.0028 | H12→L1 | 3%  |     |        |        |        | H1→L2 | 16% |
|     |        |        |        | H4→L   | 93% | S11 | 3.555  | 348.76 | 0.1314 | H3→L  | 2%  |
| S10 | 3.5064 | 353.59 | 0.0919 | H3→L   | 82% |     |        |        |        | H2→L2 | 94% |
|     |        |        |        | H3→L1  | 2%  | S12 | 3.6357 | 341.02 | 0.3979 | H8→L  | 2%  |
|     |        |        |        | H2→L1  | 2%  |     |        |        |        | H3→L1 | 69% |
|     |        |        |        | H1→L2  | 5%  |     |        |        |        | H→L3  | 22% |
| S11 | 3.7227 | 333.05 | 0.2136 | H4→L1  | 5%  | S13 | 3.6774 | 337.15 | 0.0207 | H→L3  | 3%  |
|     |        |        |        | H3→L1  | 2%  |     |        |        |        | H→L4  | 89% |
|     |        |        |        | H2→L2  | 86% | S14 | 3.6886 | 336.12 | 0.1314 | H14→L | 7%  |
| S12 | 3.7365 | 331.82 | 0.0018 | H12→L  | 12% |     |        |        |        | H5→L1 | 60% |
|     |        |        |        | H11→L  | 2%  |     |        |        |        | H→L3  | 17% |
|     |        |        |        | H4→L1  | 70% |     |        |        |        | H→L4  | 4%  |
|     |        |        |        | H4→L2  | 2%  | S15 | 3.7149 | 333.75 | 0.1611 | H14→L | 3%  |
|     |        |        |        | H2→L2  | 4%  |     |        |        |        | H8→L  | 3%  |
|     |        |        |        | H→L3   | 2%  |     |        |        |        | H5→L1 | 18% |
| S13 | 3.757  | 330.01 | 0.0177 | H3→L1  | 5%  |     |        |        |        | H3→L  | 2%  |
|     |        |        |        | H→L3   | 78% |     |        |        |        | H3→L1 | 15% |
|     |        |        |        | H→L4   | 2%  |     |        |        |        | H→L3  | 51% |
|     |        |        |        | H→L6   | 5%  | S16 | 3.9251 | 315.88 | 0.1885 | H→L5  | 95% |
| S14 | 3.7968 | 326.55 | 0.0048 | H5→L   | 3%  | S17 | 4.0216 | 308.29 | 0.305  | H8→L  | 21% |
|     |        |        |        | H3→L   | 2%  |     |        |        |        | H6→L  | 17% |
|     |        |        |        | H3→L1  | 81% |     |        |        |        | H3→L1 | 3%  |
|     |        |        |        | H→L3   | 6%  |     |        |        |        | H3→L2 | 52% |
| S15 | 3.9136 | 316.8  | 0.1841 | H5→L   | 2%  | S18 | 4.0623 | 305.21 | 0.2688 | H8→L  | 23% |
|     |        |        |        | H→L3   | 3%  |     |        |        |        | H6→L  | 17% |
|     |        |        |        | H→L4   | 91% |     |        |        |        | H3→L1 | 6%  |
| S16 | 4.0041 | 309.64 | 0.464  | H5→L   | 76% |     |        |        |        | H3→L2 | 43% |
|     |        |        |        | H3→L1  | 2%  | S19 | 4.1402 | 299.47 | 0.0869 | H9→L  | 64% |

| S17  | 4.1105 | 301.63 | 0.0318   | H2→L1 | 5%  | S20   | 4.1426 | 299.29 | 0.0321   | H7→L  | 21% |
|------|--------|--------|----------|-------|-----|-------|--------|--------|----------|-------|-----|
|      |        |        |          | H→L4  | 2%  |       |        |        |          | H→L7  | 2%  |
|      |        |        |          | H→L6  | 3%  |       |        |        |          | H9→L  | 22% |
|      |        |        |          | H6→L  | 77% |       |        |        |          | H7→L  | 58% |
|      |        |        |          | H6→L1 | 5%  |       |        |        |          | H7→L1 | 6%  |
| S18  | 4.1451 | 299.11 | 0.1666   | H→L8  | 10% | S20   | 4.1426 | 299.29 | 0.0321   | H6→L  | 6%  |
|      |        |        |          | H8→L  | 4%  |       |        |        |          |       |     |
|      |        |        |          | H7→L  | 65% |       |        |        |          |       |     |
|      |        |        |          | H7→L1 | 2%  |       |        |        |          |       |     |
|      |        |        |          | H6→L  | 4%  |       |        |        |          |       |     |
| S19  | 4.1642 | 297.74 | 0.0216   | H5→L  | 3%  |       |        |        |          |       |     |
|      |        |        |          | H→L6  | 11% |       |        |        |          |       |     |
|      |        |        |          | H7→L  | 16% |       |        |        |          |       |     |
|      |        |        |          | H5→L  | 2%  |       |        |        |          |       |     |
|      |        |        |          | H→L3  | 5%  |       |        |        |          |       |     |
| S20  | 4.1915 | 295.8  | 0.0612   | H→L6  | 61% |       |        |        |          |       |     |
|      |        |        |          | H8→L  | 24% |       |        |        |          |       |     |
|      |        |        |          | H6→L  | 8%  |       |        |        |          |       |     |
|      |        |        |          | H5→L1 | 3%  |       |        |        |          |       |     |
|      |        |        |          | H3→L2 | 2%  |       |        |        |          |       |     |
|      |        |        |          | H→L8  | 49% |       |        |        |          |       |     |
|      |        |        |          | H→L9  | 3%  |       |        |        |          |       |     |
| CL-H |        |        |          |       |     | CL-AN |        |        |          |       |     |
|      | eV     | nm     | <i>f</i> |       |     |       | eV     | nm     | <i>f</i> |       |     |
| S1   | 2.5681 | 482.78 | 0.5795   | H→L   | 98% | S1    | 2.2573 | 549.27 | 0.3987   | H→L   | 98% |
| S2   | 2.7411 | 452.31 | 0.008    | H1→L  | 59% | S2    | 2.4151 | 513.38 | 0.2774   | H1→L  | 8%  |
|      |        |        |          | H→L1  | 39% |       |        |        |          | H→L1  | 88% |
| S3   | 2.9319 | 422.88 | 0.0035   | H1→L1 | 97% | S3    | 2.6296 | 471.5  | 0.6169   | H1→L  | 89% |
| S4   | 2.945  | 421    | 0.4958   | H3→L  | 3%  | S4    | 2.6934 | 460.33 | 0.2275   | H→L1  | 9%  |
|      |        |        |          | H1→L  | 39% |       |        |        |          | H2→L  | 89% |

|     |        |        |        |       |     |     |        |        |        |        |     |
|-----|--------|--------|--------|-------|-----|-----|--------|--------|--------|--------|-----|
|     |        |        |        | H→L1  | 55% |     |        |        | H1→L1  | 8%     |     |
| S5  | 3.141  | 394.73 | 0.5925 | H2→L  | 96% | S5  | 2.7781 | 446.29 | 0.0199 | H3→L1  | 2%  |
| S6  | 3.2227 | 384.72 | 0.0044 | H4→L  | 82% |     |        |        |        | H2→L   | 9%  |
|     |        |        |        | H4→L2 | 2%  |     |        |        |        | H1→L1  | 87% |
|     |        |        |        | H3→L  | 7%  | S6  | 2.8323 | 437.75 | 0.002  | H3→L   | 78% |
|     |        |        |        | H2→L1 | 3%  |     |        |        |        | H2→L1  | 18% |
| S7  | 3.3015 | 375.54 | 0.3824 | H4→L  | 10% | S7  | 2.9821 | 415.76 | 0.2871 | H3→L   | 18% |
|     |        |        |        | H3→L  | 71% |     |        |        |        | H2→L1  | 77% |
|     |        |        |        | H2→L1 | 15% | S8  | 2.9911 | 414.51 | 0.0066 | H3→L1  | 94% |
| S8  | 3.3811 | 366.69 | 0.3117 | H8→L  | 3%  |     |        |        |        | H1→L1  | 3%  |
|     |        |        |        | H4→L1 | 41% | S9  | 3.1697 | 391.15 | 0.6034 | H4→L   | 94% |
|     |        |        |        | H3→L  | 2%  | S10 | 3.213  | 385.88 | 0.0375 | H11→L1 | 2%  |
|     |        |        |        | H3→L1 | 37% |     |        |        |        | H6→L   | 74% |
|     |        |        |        | H2→L1 | 10% |     |        |        |        | H6→L2  | 3%  |
| S9  | 3.3848 | 366.29 | 0.8942 | H4→L1 | 6%  |     |        |        |        | H5→L   | 4%  |
|     |        |        |        | H3→L  | 14% |     |        |        |        | H→L2   | 11% |
|     |        |        |        | H3→L1 | 6%  |     |        |        |        | H→L3   | 3%  |
|     |        |        |        | H2→L1 | 68% | S11 | 3.2205 | 384.98 | 0.2384 | H5→L   | 2%  |
| S10 | 3.4381 | 360.62 | 0.1443 | H8→L  | 3%  |     |        |        |        | H→L2   | 10% |
|     |        |        |        | H4→L1 | 35% |     |        |        |        | H→L3   | 82% |
|     |        |        |        | H3→L1 | 52% | S12 | 3.2339 | 383.39 | 0.041  | H6→L   | 12% |
|     |        |        |        | H2→L  | 2%  |     |        |        |        | H→L2   | 74% |
| S11 | 3.6227 | 342.24 | 0.0085 | H5→L  | 3%  |     |        |        |        | H→L3   | 7%  |
|     |        |        |        | H1→L3 | 11% | S13 | 3.3251 | 372.87 | 0.4988 | H6→L   | 4%  |
|     |        |        |        | H→L2  | 80% |     |        |        |        | H5→L   | 81% |
| S12 | 3.6461 | 340.04 | 0.0786 | H6→L  | 3%  |     |        |        |        | H4→L1  | 9%  |
|     |        |        |        | H1→L2 | 2%  | S14 | 3.3942 | 365.28 | 0.2607 | H11→L  | 6%  |
|     |        |        |        | H→L3  | 89% |     |        |        |        | H6→L1  | 58% |
| S13 | 3.791  | 327.04 | 0.1245 | H1→L2 | 86% |     |        |        |        | H6→L3  | 3%  |
|     |        |        |        | H1→L3 | 2%  |     |        |        |        | H5→L1  | 13% |
|     |        |        |        | H→L2  | 2%  |     |        |        |        | H4→L1  | 14% |

|     |        |        |        |        |     |     |        |        |        |       |     |
|-----|--------|--------|--------|--------|-----|-----|--------|--------|--------|-------|-----|
| S14 | 3.8045 | 325.89 | 0.029  | H→L3   | 2%  | S15 | 3.4113 | 363.45 | 0.7529 | H6→L1 | 11% |
|     |        |        |        | H5→L   | 2%  |     |        |        |        | H5→L  | 6%  |
|     |        |        |        | H1→L2  | 3%  |     |        |        |        | H5→L1 | 3%  |
|     |        |        |        | H1→L3  | 80% |     |        |        |        | H4→L1 | 70% |
|     |        |        |        | H→L2   | 9%  |     |        |        |        | H→L3  | 2%  |
| S15 | 3.92   | 316.29 | 0.0063 | H8→L   | 3%  | S16 | 3.4768 | 356.6  | 0.206  | H6→L1 | 13% |
|     |        |        |        | H5→L   | 76% |     |        |        |        | H5→L1 | 78% |
|     |        |        |        | H4→L1  | 5%  |     |        |        |        | H4→L  | 2%  |
|     |        |        |        | H2→L2  | 3%  | S17 | 3.5666 | 347.63 | 0.0883 | H3→L2 | 6%  |
|     |        |        |        | H→L2   | 3%  |     |        |        |        | H2→L3 | 3%  |
| S16 | 4.0094 | 309.23 | 0.0002 | H8→L1  | 3%  |     |        |        |        | H1→L2 | 79% |
|     |        |        |        | H6→L   | 12% |     |        |        |        | H1→L3 | 7%  |
|     |        |        |        | H5→L1  | 71% | S18 | 3.5773 | 346.59 | 0.0182 | H3→L3 | 5%  |
|     |        |        |        | H3→L2  | 4%  |     |        |        |        | H2→L2 | 9%  |
| S17 | 4.0579 | 305.54 | 0.0054 | H10→L1 | 2%  |     |        |        |        | H1→L2 | 7%  |
|     |        |        |        | H9→L   | 2%  |     |        |        |        | H1→L3 | 74% |
|     |        |        |        | H8→L   | 51% | S19 | 3.689  | 336.09 | 0.0002 | H3→L3 | 9%  |
|     |        |        |        | H7→L   | 22% |     |        |        |        | H2→L2 | 70% |
|     |        |        |        | H5→L   | 5%  |     |        |        |        | H1→L3 | 16% |
|     |        |        |        | H4→L1  | 7%  | S20 | 3.7254 | 332.81 | 0.0567 | H3→L2 | 4%  |
|     |        |        |        | H2→L2  | 4%  |     |        |        |        | H2→L3 | 83% |
| S18 | 4.0954 | 302.74 | 0.1285 | H6→L   | 36% |     |        |        |        | H1→L2 | 5%  |
|     |        |        |        | H5→L1  | 3%  |     |        |        |        |       |     |
|     |        |        |        | H3→L2  | 12% |     |        |        |        |       |     |
|     |        |        |        | H2→L3  | 41% |     |        |        |        |       |     |
| S19 | 4.1596 | 298.06 | 0.0591 | H11→L  | 2%  |     |        |        |        |       |     |
|     |        |        |        | H10→L1 | 2%  |     |        |        |        |       |     |
|     |        |        |        | H8→L   | 2%  |     |        |        |        |       |     |
|     |        |        |        | H5→L   | 7%  |     |        |        |        |       |     |
|     |        |        |        | H3→L3  | 8%  |     |        |        |        |       |     |



| S20    | 4.1691 | 297.39 | 0.0006   | H2→L2  | 65% |        |        |        |          |       |     |
|--------|--------|--------|----------|--------|-----|--------|--------|--------|----------|-------|-----|
|        |        |        |          | H2→L3  | 3%  |        |        |        |          |       |     |
|        |        |        |          | H13→L1 | 2%  |        |        |        |          |       |     |
|        |        |        |          | H12→L  | 4%  |        |        |        |          |       |     |
|        |        |        |          | H11→L1 | 13% |        |        |        |          |       |     |
|        |        |        |          | H10→L  | 38% |        |        |        |          |       |     |
|        |        |        |          | H8→L1  | 19% |        |        |        |          |       |     |
| H7→L1  | 8%     |        |          |        |     |        |        |        |          |       |     |
| CL-DPA |        |        |          |        |     | CL-TPA |        |        |          |       |     |
|        | eV     | nm     | <i>f</i> |        |     |        | eV     | nm     | <i>f</i> |       |     |
| S1     | 2.3154 | 535.46 | 0.3186   | H→L    | 94% | S1     | 2.2654 | 547.29 | 0.32     | H→L   | 97% |
|        |        |        |          | H→L1   | 3%  | S2     | 2.4089 | 514.69 | 0.1462   | H1→L  | 20% |
| S2     | 2.4696 | 502.04 | 0.3692   | H2→L   | 4%  |        |        |        |          | H→L1  | 77% |
|        |        |        |          | H1→L   | 17% | S3     | 2.4879 | 498.35 | 0.5015   | H1→L  | 79% |
|        |        |        |          | H→L    | 3%  |        |        |        |          | H→L1  | 20% |
|        |        |        |          | H→L1   | 73% | S4     | 2.6069 | 475.6  | 0.3512   | H2→L  | 77% |
| S3     | 2.5212 | 491.76 | 0.2188   | H1→L   | 81% |        |        |        |          | H1→L1 | 19% |
|        |        |        |          | H→L1   | 15% | S5     | 2.6443 | 468.88 | 0.0015   | H2→L  | 19% |
| S4     | 2.6237 | 472.55 | 0.0246   | H1→L1  | 94% |        |        |        |          | H1→L1 | 79% |
|        |        |        |          | H1→L2  | 2%  | S6     | 2.759  | 449.38 | 0.0133   | H3→L  | 67% |
| S5     | 2.7449 | 451.69 | 0.4635   | H3→L   | 5%  |        |        |        |          | H2→L1 | 29% |
|        |        |        |          | H2→L   | 84% | S7     | 2.9194 | 424.7  | 0.7122   | H3→L  | 29% |
|        |        |        |          | H→L1   | 5%  |        |        |        |          | H2→L1 | 66% |
| S6     | 2.8348 | 437.36 | 0.0102   | H3→L   | 76% | S8     | 2.9242 | 423.99 | 0.0033   | H3→L1 | 96% |
|        |        |        |          | H2→L   | 3%  | S9     | 3.1295 | 396.18 | 0.5487   | H4→L  | 96% |
|        |        |        |          | H2→L1  | 19% | S10    | 3.2065 | 386.67 | 0.0176   | H7→L  | 13% |
| S7     | 2.902  | 427.24 | 0.1362   | H3→L   | 13% |        |        |        |          | H6→L  | 67% |
|        |        |        |          | H3→L1  | 13% |        |        |        |          | H5→L  | 5%  |
|        |        |        |          | H2→L1  | 70% |        |        |        |          | H→L2  | 5%  |
| S8     | 3.0229 | 410.14 | 0.1164   | H3→L   | 4%  | S11    | 3.2226 | 384.74 | 0.1529   | H6→L  | 6%  |

|     |        |        |        |       |     |
|-----|--------|--------|--------|-------|-----|
|     |        |        |        | H3→L1 | 81% |
|     |        |        |        | H2→L  | 2%  |
|     |        |        |        | H2→L1 | 7%  |
| S9  | 3.1453 | 394.19 | 0.5938 | H4→L  | 94% |
| S10 | 3.2228 | 384.71 | 0.0872 | H6→L  | 69% |
|     |        |        |        | H5→L  | 17% |
|     |        |        |        | H4→L1 | 3%  |
| S11 | 3.2853 | 377.4  | 0.6224 | H6→L  | 15% |
|     |        |        |        | H5→L  | 53% |
|     |        |        |        | H→L2  | 18% |
|     |        |        |        | H→L3  | 9%  |
| S12 | 3.3124 | 374.3  | 0.007  | H6→L  | 4%  |
|     |        |        |        | H5→L  | 16% |
|     |        |        |        | H4→L1 | 16% |
|     |        |        |        | H→L2  | 55% |
|     |        |        |        | H→L3  | 4%  |
| S13 | 3.3472 | 370.41 | 0.3995 | H6→L1 | 6%  |
|     |        |        |        | H5→L1 | 27% |
|     |        |        |        | H4→L1 | 15% |
|     |        |        |        | H→L2  | 11% |
|     |        |        |        | H→L3  | 36% |
| S14 | 3.3713 | 367.76 | 0.4603 | H6→L1 | 7%  |
|     |        |        |        | H5→L  | 5%  |
|     |        |        |        | H5→L1 | 20% |
|     |        |        |        | H4→L1 | 54% |
|     |        |        |        | H→L2  | 7%  |
| S15 | 3.3844 | 366.34 | 0.0873 | H15→L | 2%  |
|     |        |        |        | H6→L1 | 45% |
|     |        |        |        | H5→L  | 3%  |
|     |        |        |        | H5→L1 | 2%  |
|     |        |        |        | H4→L1 | 7%  |

|     |        |        |        |       |     |
|-----|--------|--------|--------|-------|-----|
|     |        |        |        | H→L2  | 84% |
|     |        |        |        | H→L4  | 4%  |
| S12 | 3.2337 | 383.41 | 0.6946 | H5→L  | 23% |
|     |        |        |        | H4→L1 | 3%  |
|     |        |        |        | H→L2  | 3%  |
|     |        |        |        | H→L3  | 65% |
| S13 | 3.2713 | 379    | 0.3784 | H6→L  | 3%  |
|     |        |        |        | H5→L  | 60% |
|     |        |        |        | H4→L1 | 8%  |
|     |        |        |        | H1→L2 | 3%  |
|     |        |        |        | H→L3  | 20% |
| S14 | 3.3471 | 370.43 | 0.6372 | H4→L1 | 79% |
|     |        |        |        | H1→L2 | 6%  |
|     |        |        |        | H→L3  | 7%  |
| S15 | 3.3758 | 367.27 | 0.1488 | H15→L | 2%  |
|     |        |        |        | H14→L | 2%  |
|     |        |        |        | H7→L1 | 8%  |
|     |        |        |        | H6→L1 | 47% |
|     |        |        |        | H5→L1 | 32% |
| S16 | 3.4246 | 362.04 | 0.1334 | H7→L1 | 4%  |
|     |        |        |        | H6→L1 | 23% |
|     |        |        |        | H5→L1 | 62% |
|     |        |        |        | H4→L  | 2%  |
| S17 | 3.4463 | 359.76 | 0.005  | H5→L  | 4%  |
|     |        |        |        | H4→L1 | 3%  |
|     |        |        |        | H1→L2 | 83% |
| S18 | 3.4614 | 358.19 | 0.025  | H1→L3 | 91% |
|     |        |        |        | H→L4  | 2%  |
| S19 | 3.5809 | 346.23 | 0.0582 | H7→L  | 4%  |
|     |        |        |        | H3→L3 | 5%  |
|     |        |        |        | H2→L2 | 37% |

| S16           | 3.4503 | 359.35 | 0.1537   | H→L3  | 31% | S20    | 3.6317 | 341.4  | 0.0759   | H→L4  | 45% |
|---------------|--------|--------|----------|-------|-----|--------|--------|--------|----------|-------|-----|
|               |        |        |          | H6→L1 | 24% |        |        |        |          | H7→L  | 6%  |
|               |        |        |          | H5→L1 | 46% |        |        |        |          | H3→L3 | 3%  |
| S17           | 3.5128 | 352.95 | 0.0029   | H→L3  | 14% |        |        |        |          | H2→L2 | 36% |
|               |        |        |          | H1→L1 | 3%  |        |        |        |          | H1→L3 | 3%  |
|               |        |        |          | H1→L2 | 72% |        |        |        |          | H→L2  | 3%  |
|               |        |        |          | H1→L3 | 20% |        |        |        |          | H→L4  | 37% |
| S18           | 3.5672 | 347.57 | 0.0048   | H1→L2 | 19% |        |        |        |          |       |     |
|               |        |        |          | H1→L3 | 75% |        |        |        |          |       |     |
|               |        |        |          | H1→L5 | 2%  |        |        |        |          |       |     |
| S19           | 3.6746 | 337.41 | 0.0725   | H4→L2 | 2%  |        |        |        |          |       |     |
|               |        |        |          | H2→L2 | 90% |        |        |        |          |       |     |
| S20           | 3.7809 | 327.92 | 0.0724   | H7→L  | 10% |        |        |        |          |       |     |
|               |        |        |          | H3→L3 | 16% |        |        |        |          |       |     |
|               |        |        |          | H2→L3 | 66% |        |        |        |          |       |     |
| AJ1-H (AJ2-H) |        |        |          |       |     | AJ1-AN |        |        |          |       |     |
|               | eV     | nm     | <i>f</i> |       |     |        | eV     | nm     | <i>f</i> |       |     |
| S1            | 2.5522 | 485.79 | 0.37     | H→L   | 97% | S1     | 2.3029 | 538.38 | 0.6368   | H→L   | 96% |
| S2            | 2.6224 | 472.79 | 0.0002   | H1→L  | 64% | S2     | 2.439  | 508.35 | 0.0806   | H3→L  | 2%  |
|               |        |        |          | H→L1  | 34% |        |        |        |          | H1→L  | 85% |
| S3            | 2.8372 | 436.99 | 1.0665   | H1→L  | 34% |        |        |        |          | H→L1  | 10% |
|               |        |        |          | H→L1  | 63% | S3     | 2.5267 | 490.7  | 0.6787   | H3→L  | 19% |
| S4            | 2.8816 | 430.26 | 0.0199   | H1→L1 | 98% |        |        |        |          | H2→L1 | 4%  |
| S5            | 3.1113 | 398.49 | 0.1675   | H2→L  | 42% |        |        |        |          | H1→L  | 14% |
|               |        |        |          | H→L2  | 55% |        |        |        |          | H→L1  | 61% |
| S6            | 3.1504 | 393.55 | 0.1818   | H2→L  | 55% | S4     | 2.6034 | 476.24 | 0.0702   | H2→L  | 94% |
|               |        |        |          | H→L2  | 43% | S5     | 2.6764 | 463.26 | 0.9205   | H3→L  | 70% |
| S7            | 3.2551 | 380.89 | 0.0606   | H7→L1 | 2%  |        |        |        |          | H2→L1 | 3%  |
|               |        |        |          | H4→L  | 58% |        |        |        |          | H→L1  | 26% |
|               |        |        |          | H4→L2 | 9%  | S6     | 2.6813 | 462.41 | 0.1966   | H1→L1 | 96% |

|     |        |        |        |       |     |     |        |        |        |       |        |        |        |       |     |
|-----|--------|--------|--------|-------|-----|-----|--------|--------|--------|-------|--------|--------|--------|-------|-----|
| S8  | 3.2991 | 375.81 | 0.009  | H3→L  | 26% | S7  | 2.8465 | 435.57 | 0.0158 | H3→L1 | 95%    |        |        |       |     |
|     |        |        |        | H4→L  | 7%  |     |        |        |        | S8    | 2.8586 | 433.72 | 0.2739 | H3→L  | 6%  |
|     |        |        |        | H3→L  | 10% |     |        |        |        |       |        |        |        | H2→L1 | 88% |
|     |        |        |        | H2→L1 | 76% |     |        |        |        | S9    | 2.8734 | 431.49 | 0.0591 | H2→L2 | 5%  |
| S9  | 3.3499 | 370.12 | 0.0264 | H1→L2 | 3%  | S10 | 3.0661 | 404.37 | 0.1657 | H→L2  | 92%    |        |        |       |     |
|     |        |        |        | H1→L2 | 88% |     |        |        |        | H1→L2 | 95%    |        |        |       |     |
| S10 | 3.4401 | 360.41 | 0.0053 | H→L3  | 7%  | S11 | 3.1392 | 394.95 | 0.322  | H→L3  | 2%     |        |        |       |     |
|     |        |        |        | H7→L  | 6%  |     |        |        |        | H4→L  | 79%    |        |        |       |     |
|     |        |        |        | H7→L2 | 3%  |     |        |        |        | H2→L2 | 16%    |        |        |       |     |
|     |        |        |        | H4→L1 | 64% |     |        |        |        | S12   | 3.1971 | 387.81 | 0.1779 | H5→L  | 13% |
| S11 | 3.4876 | 355.5  | 0.6642 | H4→L3 | 4%  | S13 | 3.2094 | 386.32 | 0.0049 | H3→L2 | 16%    |        |        |       |     |
|     |        |        |        | H3→L1 | 19% |     |        |        |        | H2→L2 | 3%     |        |        |       |     |
|     |        |        |        | H4→L  | 11% |     |        |        |        | H→L3  | 60%    |        |        |       |     |
|     |        |        |        | H3→L  | 29% |     |        |        |        | H4→L  | 16%    |        |        |       |     |
| S12 | 3.5482 | 349.43 | 0.6136 | H2→L1 | 11% | S14 | 3.226  | 384.32 | 0.0335 | H2→L2 | 73%    |        |        |       |     |
|     |        |        |        | H1→L2 | 2%  |     |        |        |        | H→L2  | 4%     |        |        |       |     |
|     |        |        |        | H→L3  | 44% |     |        |        |        | H→L3  | 3%     |        |        |       |     |
|     |        |        |        | H6→L  | 2%  |     |        |        |        | H6→L  | 24%    |        |        |       |     |
| S13 | 3.6684 | 337.98 | 0.0225 | H4→L  | 9%  | S15 | 3.2885 | 377.03 | 0.1849 | H5→L  | 47%    |        |        |       |     |
|     |        |        |        | H3→L  | 27% |     |        |        |        | H5→L2 | 6%     |        |        |       |     |
|     |        |        |        | H2→L1 | 7%  |     |        |        |        | H3→L2 | 4%     |        |        |       |     |
|     |        |        |        | H1→L2 | 4%  |     |        |        |        | H→L3  | 9%     |        |        |       |     |
| S14 | 3.7361 | 331.85 | 0.0988 | H→L3  | 43% | S16 | 3.3292 | 372.41 | 0.0088 | H4→L1 | 8%     |        |        |       |     |
|     |        |        |        | H1→L3 | 97% |     |        |        |        | H3→L2 | 72%    |        |        |       |     |
| S15 | 3.774  | 328.52 | 0.0259 | H5→L  | 17% | S17 | 3.342  | 370.99 | 0.0196 | H→L3  | 17%    |        |        |       |     |
|     |        |        |        | H4→L1 | 17% |     |        |        |        | H6→L  | 16%    |        |        |       |     |
|     |        |        |        | H3→L1 | 42% |     |        |        |        | H5→L  | 7%     |        |        |       |     |
|     |        |        |        | H2→L2 | 21% |     |        |        |        | H4→L1 | 66%    |        |        |       |     |
|     |        |        |        | H4→L1 | 2%  |     |        |        |        | H3→L2 | 3%     |        |        |       |     |
|     |        |        |        | H3→L1 | 19% |     |        |        |        | H5→L1 | 2%     |        |        |       |     |
|     |        |        |        | H2→L2 | 73% |     |        |        |        |       |        |        |        |       |     |

| S16     | 3.8063 | 325.74 | 0.0006 | H5→L  | 78% | S18     | 3.4077 | 363.83 | 0.0000 | H1→L3  | 93% |
|---------|--------|--------|--------|-------|-----|---------|--------|--------|--------|--------|-----|
|         |        |        |        | H3→L1 | 16% |         |        |        |        | H11→L  | 4%  |
| S17     | 4.0201 | 308.41 | 0.0119 | H10→L | 2%  |         |        |        |        | H11→L2 | 2%  |
|         |        |        |        | H7→L1 | 15% |         |        |        |        | H6→L1  | 28% |
|         |        |        |        | H4→L  | 12% |         |        |        |        | H6→L3  | 2%  |
|         |        |        |        | H4→L2 | 41% |         |        |        |        | H5→L1  | 50% |
|         |        |        |        | H3→L2 | 22% |         |        |        |        | H5→L3  | 3%  |
| S18     | 4.0415 | 306.78 | 0.0066 | H7→L  | 61% | S19     | 3.5179 | 352.44 | 0.0334 | H1→L3  | 5%  |
|         |        |        |        | H7→L2 | 6%  |         |        |        |        | H6→L   | 2%  |
|         |        |        |        | H6→L  | 9%  |         |        |        |        | H4→L1  | 3%  |
|         |        |        |        | H4→L1 | 7%  |         |        |        |        | H2→L3  | 88% |
|         |        |        |        | H2→L3 | 11% |         |        |        |        | H→L3   | 3%  |
| S19     | 4.0491 | 306.21 | 0.0054 | H7→L  | 15% | S20     | 3.5587 | 348.4  | 0.7634 | H6→L   | 42% |
|         |        |        |        | H6→L  | 12% |         |        |        |        | H5→L   | 20% |
|         |        |        |        | H5→L1 | 26% |         |        |        |        | H4→L1  | 16% |
|         |        |        |        | H4→L2 | 4%  |         |        |        |        | H3→L3  | 3%  |
|         |        |        |        | H3→L2 | 7%  |         |        |        |        | H2→L3  | 5%  |
|         |        |        |        | H2→L3 | 29% |         |        |        |        |        |     |
| S20     | 4.0874 | 303.34 | 0.0352 | H7→L  | 2%  |         |        |        |        |        |     |
|         |        |        |        | H5→L1 | 51% |         |        |        |        |        |     |
|         |        |        |        | H2→L3 | 41% |         |        |        |        |        |     |
| AJ1-DPA |        |        |        |       |     | AJ1-TPA |        |        |        |        |     |
|         | eV     | nm     | $f$    |       |     |         | eV     | nm     | $f$    |        |     |
| S1      | 2.3536 | 526.78 | 0.7249 | H→L   | 98% | S1      | 2.2144 | 559.9  | 0.5073 | H→L    | 95% |
| S2      | 2.5279 | 490.47 | 0.1107 | H3→L  | 6%  | S2      | 2.2921 | 540.92 | 0.2756 | H1→L   | 99% |
|         |        |        |        | H1→L  | 29% | S3      | 2.4527 | 505.51 | 0.5634 | H3→L   | 5%  |
|         |        |        |        | H→L1  | 62% |         |        |        |        | H2→L1  | 4%  |
| S3      | 2.6699 | 464.39 | 1.2175 | H3→L  | 4%  |         |        |        |        | H→L1   | 89% |
|         |        |        |        | H1→L  | 69% | S4      | 2.5076 | 494.44 | 0.2706 | H2→L   | 15% |
|         |        |        |        | H→L1  | 25% |         |        |        |        | H1→L1  | 79% |

|     |        |        |        |       |     |     |        |        |        |       |     |
|-----|--------|--------|--------|-------|-----|-----|--------|--------|--------|-------|-----|
| S4  | 2.7866 | 444.93 | 0.0251 | H2→L  | 93% |     |        |        |        | H→L   | 3%  |
|     |        |        |        | H2→L2 | 2%  | S5  | 2.5413 | 487.88 | 0.1109 | H2→L  | 79% |
| S5  | 2.7968 | 443.31 | 0.7138 | H3→L  | 87% |     |        |        |        | H1→L1 | 17% |
|     |        |        |        | H→L1  | 11% | S6  | 2.6355 | 470.45 | 0.1326 | H3→L  | 64% |
| S6  | 2.852  | 434.72 | 0.3095 | H1→L1 | 88% |     |        |        |        | H2→L1 | 25% |
|     |        |        |        | H→L2  | 8%  |     |        |        |        | H→L1  | 9%  |
| S7  | 2.9074 | 426.45 | 0.0197 | H1→L1 | 7%  | S7  | 2.8024 | 442.41 | 1.0889 | H3→L  | 28% |
|     |        |        |        | H→L2  | 89% |     |        |        |        | H2→L1 | 67% |
| S8  | 2.9857 | 415.27 | 0.0002 | H3→L1 | 89% | S8  | 2.8219 | 439.36 | 0.0479 | H2→L2 | 4%  |
|     |        |        |        | H2→L  | 3%  |     |        |        |        | H→L2  | 92% |
|     |        |        |        | H2→L1 | 3%  | S9  | 2.8572 | 433.93 | 0.0195 | H3→L1 | 97% |
| S9  | 3.0372 | 408.22 | 0.0499 | H3→L1 | 3%  | S10 | 2.906  | 426.65 | 0.0582 | H1→L2 | 97% |
|     |        |        |        | H2→L1 | 92% | S11 | 3.0871 | 401.62 | 0.2019 | H4→L  | 36% |
| S10 | 3.2093 | 386.33 | 0.0006 | H3→L2 | 3%  |     |        |        |        | H2→L2 | 58% |
|     |        |        |        | H1→L2 | 34% | S12 | 3.1293 | 396.2  | 0.1565 | H4→L  | 59% |
|     |        |        |        | H→L3  | 59% |     |        |        |        | H2→L2 | 35% |
| S11 | 3.2421 | 382.42 | 0.2229 | H5→L  | 3%  |     |        |        |        | H→L2  | 3%  |
|     |        |        |        | H4→L  | 90% | S13 | 3.1679 | 391.37 | 0.118  | H6→L  | 3%  |
|     |        |        |        | H2→L2 | 2%  |     |        |        |        | H3→L2 | 2%  |
| S12 | 3.2818 | 377.79 | 0.4484 | H5→L  | 24% |     |        |        |        | H→L3  | 89% |
|     |        |        |        | H4→L  | 2%  | S14 | 3.215  | 385.64 | 0.0185 | H7→L  | 3%  |
|     |        |        |        | H1→L2 | 46% |     |        |        |        | H6→L  | 73% |
|     |        |        |        | H→L3  | 18% |     |        |        |        | H6→L2 | 8%  |
| S13 | 3.3108 | 374.49 | 0.0245 | H6→L  | 15% |     |        |        |        | H5→L  | 3%  |
|     |        |        |        | H6→L2 | 2%  |     |        |        |        | H→L3  | 4%  |
|     |        |        |        | H5→L  | 44% | S15 | 3.2234 | 384.64 | 0.0111 | H1→L3 | 96% |
|     |        |        |        | H5→L2 | 7%  | S16 | 3.2744 | 378.65 | 0.0027 | H8→L  | 2%  |
|     |        |        |        | H4→L1 | 3%  |     |        |        |        | H5→L  | 15% |
|     |        |        |        | H1→L2 | 12% |     |        |        |        | H4→L1 | 68% |
|     |        |        |        | H→L3  | 10% |     |        |        |        | H3→L2 | 11% |
| S14 | 3.4095 | 363.65 | 0.029  | H4→L  | 3%  | S17 | 3.3046 | 375.18 | 0.0484 | H5→L  | 4%  |

|                |        |        |          |       |     |                |        |        |          |       |     |
|----------------|--------|--------|----------|-------|-----|----------------|--------|--------|----------|-------|-----|
| S15            | 3.4122 | 363.36 | 0.0848   | H3→L2 | 3%  | S18            | 3.3968 | 365    | 0.0353   | H4→L1 | 7%  |
|                |        |        |          | H2→L2 | 88% |                |        |        |          | H3→L2 | 80% |
|                |        |        |          | H4→L1 | 5%  |                |        |        |          | H2→L3 | 2%  |
|                |        |        |          | H3→L2 | 84% |                |        |        |          | H→L3  | 2%  |
|                |        |        |          | H2→L2 | 3%  | S18            | 3.3968 | 365    | 0.0353   | H17→L | 4%  |
|                |        |        |          | H→L3  | 4%  |                |        |        |          | H7→L1 | 4%  |
| S16            | 3.4426 | 360.15 | 0.0224   | H6→L  | 27% |                |        |        |          | H6→L1 | 75% |
|                |        |        |          | H5→L  | 3%  |                |        |        |          | H6→L3 | 4%  |
|                |        |        |          | H5→L1 | 4%  |                |        |        |          | H5→L1 | 2%  |
|                |        |        |          | H4→L1 | 57% | S19            | 3.4095 | 363.64 | 1.1517   | H6→L  | 3%  |
| S17            | 3.4837 | 355.9  | 0.0106   | H12→L | 2%  |                |        |        |          | H6→L1 | 3%  |
|                |        |        |          | H6→L  | 3%  |                |        |        |          | H5→L  | 65% |
|                |        |        |          | H6→L1 | 14% |                |        |        |          | H4→L1 | 19% |
|                |        |        |          | H5→L1 | 56% |                |        |        |          | H→L3  | 2%  |
|                |        |        |          | H5→L3 | 4%  | S20            | 3.4761 | 356.67 | 0.0103   | H8→L  | 2%  |
|                |        |        |          | H4→L1 | 3%  |                |        |        |          | H3→L2 | 3%  |
|                |        |        |          | H1→L3 | 10% |                |        |        |          | H2→L3 | 87% |
| S18            | 3.5143 | 352.8  | 0.0037   | H5→L1 | 7%  |                |        |        |          |       |     |
|                |        |        |          | H1→L3 | 85% |                |        |        |          |       |     |
| S19            | 3.6895 | 336.05 | 0.02     | H3→L3 | 92% |                |        |        |          |       |     |
|                |        |        |          | H2→L3 | 3%  |                |        |        |          |       |     |
| S20            | 3.711  | 334.1  | 0.1059   | H6→L  | 12% |                |        |        |          |       |     |
|                |        |        |          | H5→L  | 3%  |                |        |        |          |       |     |
|                |        |        |          | H4→L1 | 11% |                |        |        |          |       |     |
|                |        |        |          | H3→L3 | 2%  |                |        |        |          |       |     |
|                |        |        |          | H2→L3 | 65% |                |        |        |          |       |     |
|                |        |        |          | H→L3  | 3%  |                |        |        |          |       |     |
| <b>AJ2-TPA</b> |        |        |          |       |     | <b>AJ2-DPA</b> |        |        |          |       |     |
|                | eV     | nm     | <i>f</i> |       |     |                | eV     | nm     | <i>f</i> |       |     |
| S1             | 1.9867 | 624.07 | 0.1895   | H→L   | 98% | S1             | 1.8823 | 658.7  | 0.1743   | H1→L1 | 2%  |

|     |        |        |        |        |     |     |        |        |        |       |     |
|-----|--------|--------|--------|--------|-----|-----|--------|--------|--------|-------|-----|
| S2  | 2.0173 | 614.59 | 0.0725 | H1→L   | 98% |     |        |        |        | H→L   | 96% |
| S3  | 2.2423 | 552.95 | 0.0289 | H1→L1  | 97% | S2  | 1.9234 | 644.6  | 0.094  | H1→L  | 98% |
| S4  | 2.2446 | 552.36 | 0.1925 | H→L1   | 97% | S3  | 2.1261 | 583.15 | 0.1499 | H1→L1 | 2%  |
| S5  | 2.6244 | 472.44 | 0.0237 | H→L2   | 95% |     |        |        |        | H→L1  | 95% |
| S6  | 2.6666 | 464.96 | 0.0003 | H1→L2  | 97% | S4  | 2.1299 | 582.11 | 0.0168 | H1→L1 | 93% |
| S7  | 2.7669 | 448.1  | 0.4596 | H2→L   | 96% |     |        |        |        | H→L   | 3%  |
| S8  | 2.8827 | 430.1  | 0.0034 | H3→L   | 53% |     |        |        |        | H→L1  | 2%  |
|     |        |        |        | H2→L1  | 31% | S5  | 2.5473 | 486.72 | 0.0023 | H→L2  | 96% |
|     |        |        |        | H→L3   | 10% | S6  | 2.5847 | 479.68 | 0.0013 | H1→L2 | 97% |
| S9  | 2.9466 | 420.77 | 0.1096 | H2→L1  | 21% | S7  | 2.8201 | 439.64 | 0.6099 | H2→L  | 97% |
|     |        |        |        | H→L3   | 75% | S8  | 2.9014 | 427.32 | 0.0004 | H3→L  | 3%  |
| S10 | 2.9615 | 418.65 | 0.0008 | H1→L3  | 97% |     |        |        |        | H→L3  | 93% |
| S11 | 2.9983 | 413.52 | 0.7782 | H3→L   | 44% | S9  | 2.9272 | 423.55 | 0.0059 | H1→L3 | 98% |
|     |        |        |        | H2→L1  | 40% | S10 | 2.9363 | 422.25 | 0.2299 | H5→L  | 3%  |
|     |        |        |        | H→L3   | 13% |     |        |        |        | H3→L  | 14% |
| S12 | 3.1478 | 393.87 | 0.0319 | H4→L   | 21% |     |        |        |        | H2→L1 | 76% |
|     |        |        |        | H3→L1  | 71% |     |        |        |        | H→L3  | 3%  |
|     |        |        |        | H2→L2  | 4%  | S11 | 3.1172 | 397.74 | 0.9092 | H3→L  | 79% |
| S13 | 3.1753 | 390.47 | 0.2611 | H4→L   | 73% |     |        |        |        | H2→L1 | 16% |
|     |        |        |        | H3→L1  | 23% | S12 | 3.2476 | 381.78 | 0.0682 | H6→L  | 12% |
| S14 | 3.2452 | 382.05 | 0.0712 | H11→L1 | 2%  |     |        |        |        | H5→L  | 3%  |
|     |        |        |        | H6→L   | 55% |     |        |        |        | H4→L  | 51% |
|     |        |        |        | H6→L2  | 9%  |     |        |        |        | H3→L1 | 20% |
|     |        |        |        | H5→L   | 28% |     |        |        |        | H2→L2 | 7%  |
|     |        |        |        | H5→L2  | 3%  | S13 | 3.2711 | 379.03 | 0.0551 | H6→L  | 53% |
| S15 | 3.3309 | 372.22 | 0.0279 | H3→L1  | 2%  |     |        |        |        | H6→L2 | 7%  |
|     |        |        |        | H2→L2  | 90% |     |        |        |        | H5→L  | 14% |
| S16 | 3.3726 | 367.63 | 0.0353 | H6→L   | 6%  |     |        |        |        | H4→L  | 5%  |
|     |        |        |        | H5→L   | 17% |     |        |        |        | H3→L1 | 11% |
|     |        |        |        | H4→L1  | 70% |     |        |        |        | H2→L2 | 3%  |
|     |        |        |        | H2→L1  | 3%  | S14 | 3.3087 | 374.72 | 0.0878 | H4→L  | 34% |



|                |        |          |        |        |     |     |        |        |        |       |     |
|----------------|--------|----------|--------|--------|-----|-----|--------|--------|--------|-------|-----|
| S17            | 3.4342 | 361.03   | 0.0145 | H11→L  | 5%  | S15 | 3.3702 | 367.88 | 0.0052 | H3→L1 | 62% |
|                |        |          |        | H11→L2 | 3%  |     |        |        |        | H6→L1 | 3%  |
|                |        |          |        | H6→L1  | 58% |     |        |        |        | H4→L  | 4%  |
|                |        |          |        | H6→L3  | 5%  |     |        |        |        | H3→L1 | 4%  |
|                |        |          |        | H5→L1  | 22% |     |        |        |        | H2→L2 | 85% |
|                |        |          |        | H2→L2  | 2%  | S16 | 3.4519 | 359.17 | 0.1689 | H15→L | 3%  |
| S18            | 3.4949 | 354.75   | 1.1396 | H6→L   | 23% |     |        |        |        | H6→L  | 5%  |
|                |        |          |        | H5→L   | 46% |     |        |        |        | H6→L1 | 37% |
|                |        |          |        | H4→L1  | 24% |     |        |        |        | H6→L3 | 2%  |
| S19            | 3.5809 | 346.23   | 0.0104 | H3→L2  | 90% |     |        |        |        | H5→L  | 22% |
|                |        |          |        | H2→L3  | 6%  |     |        |        |        | H5→L1 | 7%  |
| S20            | 3.6731 | 337.55   | 0.0166 | H10→L  | 4%  | S17 | 3.4618 | 358.15 | 0.3278 | H4→L1 | 15% |
|                |        |          |        | H3→L2  | 5%  |     |        |        |        | H15→L | 2%  |
|                |        |          |        | H2→L3  | 84% |     |        |        |        | H6→L  | 8%  |
|                |        |          |        |        |     |     |        |        |        | H6→L1 | 29% |
|                |        |          |        |        |     |     |        |        |        | H5→L  | 38% |
|                |        |          |        |        |     |     |        |        |        | H5→L1 | 6%  |
|                |        |          |        |        |     | S18 | 3.5328 | 350.95 | 0.3182 | H4→L1 | 6%  |
|                |        |          |        |        |     |     |        |        |        | H6→L  | 5%  |
|                |        |          |        |        |     |     |        |        |        | H5→L  | 13% |
|                |        |          |        |        |     | S19 | 3.7001 | 335.08 | 0.1775 | H4→L1 | 73% |
|                |        |          |        |        |     |     |        |        |        | H9→L  | 26% |
|                |        |          |        |        |     |     |        |        |        | H7→L  | 9%  |
|                |        |          |        |        |     |     |        |        |        | H6→L1 | 9%  |
|                |        |          |        |        |     |     |        |        |        | H5→L1 | 37% |
|                |        |          |        |        |     |     |        |        |        | H1→L7 | 7%  |
|                |        |          |        |        |     | S20 | 3.7206 | 333.24 | 0.0233 | H3→L2 | 40% |
|                |        |          |        |        |     |     |        |        |        | H2→L3 | 50% |
| <b>AJ2-TPA</b> |        |          |        |        |     |     |        |        |        |       |     |
| eV             | nm     | <i>f</i> |        |        |     |     |        |        |        |       |     |

|     |        |        |        |       |     |
|-----|--------|--------|--------|-------|-----|
| S1  | 1.997  | 620.86 | 0.171  | H→L   | 98% |
| S2  | 2.0205 | 613.63 | 0.0547 | H1→L  | 99% |
| S3  | 2.2462 | 551.98 | 0.103  | H→L1  | 97% |
| S4  | 2.2496 | 551.15 | 0.0265 | H1→L1 | 97% |
| S5  | 2.5955 | 477.68 | 0.4061 | H2→L  | 84% |
|     |        |        |        | H→L2  | 12% |
| S6  | 2.6663 | 465.01 | 0.0304 | H2→L  | 13% |
|     |        |        |        | H→L2  | 85% |
| S7  | 2.6695 | 464.45 | 0.0053 | H3→L  | 25% |
|     |        |        |        | H2→L1 | 9%  |
|     |        |        |        | H1→L2 | 63% |
| S8  | 2.7071 | 457.99 | 0.0248 | H3→L  | 54% |
|     |        |        |        | H2→L1 | 8%  |
|     |        |        |        | H1→L2 | 34% |
|     |        |        |        | H→L1  | 2%  |
| S9  | 2.8398 | 436.6  | 0.8131 | H3→L  | 17% |
|     |        |        |        | H2→L1 | 78% |
| S10 | 2.9246 | 423.94 | 0.0178 | H3→L1 | 91% |
|     |        |        |        | H1→L3 | 5%  |
| S11 | 2.9921 | 414.37 | 0.0031 | H→L3  | 98% |
| S12 | 3.0043 | 412.69 | 0      | H3→L1 | 5%  |
|     |        |        |        | H1→L3 | 93% |
| S13 | 3.0927 | 400.9  | 0.4822 | H4→L  | 95% |
| S14 | 3.2012 | 387.31 | 0.0272 | H2→L2 | 94% |
| S15 | 3.2536 | 381.06 | 0.001  | H6→L  | 9%  |
|     |        |        |        | H5→L  | 27% |
|     |        |        |        | H4→L1 | 58% |
| S16 | 3.2684 | 379.34 | 0.1012 | H6→L  | 58% |
|     |        |        |        | H6→L2 | 7%  |
|     |        |        |        | H5→L  | 5%  |
|     |        |        |        | H4→L1 | 24% |

|     |        |        |        |        |     |
|-----|--------|--------|--------|--------|-----|
| S17 | 3.3814 | 366.67 | 0.0417 | H3→L2  | 93% |
| S18 | 3.4512 | 359.25 | 0.0669 | H19→L  | 5%  |
|     |        |        |        | H19→L2 | 2%  |
|     |        |        |        | H6→L1  | 64% |
|     |        |        |        | H6→L3  | 4%  |
|     |        |        |        | H5→L   | 4%  |
|     |        |        |        | H5→L1  | 13% |
| S19 | 3.4562 | 358.73 | 0.9721 | H6→L   | 16% |
|     |        |        |        | H6→L1  | 5%  |
|     |        |        |        | H5→L   | 50% |
|     |        |        |        | H4→L1  | 11% |
|     |        |        |        | H2→L3  | 4%  |
|     |        |        |        | H1→L5  | 4%  |
|     |        |        |        | H→L4   | 4%  |
| S20 | 3.5799 | 346.33 | 0.0599 | H18→L  | 2%  |
|     |        |        |        | H3→L2  | 2%  |
|     |        |        |        | H2→L3  | 87% |
